# Supplementary material
Source: MDPI journal article supplement (https://www.mdpi.com/2227-9717/9/12/2194)
Supplement: s1 [file s1]

## Supporting Information

Table S1. Dimensions and resistance of bamboo charcoal anodes

| MFC               | BC # | Dimensions     |               |                   |                                                 | Resistance          |                    |                                 |
|-------------------|------|----------------|---------------|-------------------|-------------------------------------------------|---------------------|--------------------|---------------------------------|
|                   |      | Length<br>(cm) | Width<br>(cm) | Thickness<br>(cm) | Anode area <sup>(a)</sup><br>(cm <sup>2</sup> ) | Lengthwise<br>(Ohm) | Widthwise<br>(Ohm) | Average <sup>(b)</sup><br>(Ohm) |
| MFC 1<br>(530 mL) | BC-1 | 7.1            | 3.5           | 0.8               | 63.9                                            | 35                  | 28                 | 32                              |
|                   | BC-2 | 7.2            | 4.5           | 0.7               | 78.0                                            | 22                  | 16                 | 19                              |
|                   | BC-3 | 7.7            | 4.6           | 0.4               | 78.8                                            | 28                  | 24                 | 26                              |
|                   | BC-4 | 7.4            | 4.5           | 0.4               | 74.3                                            | 31                  | 25                 | 28                              |
| MFC 2<br>(530 mL) | BC-1 | 7.4            | 4.3           | 0.9               | 80.8                                            | 27                  | 25                 | 26                              |
|                   | BC-2 | 7              | 4.5           | 0.6               | 74.1                                            | 26                  | 25                 | 26                              |
|                   | BC-3 | 7.4            | 4             | 0.8               | 74.2                                            | 19                  | 17                 | 18                              |
|                   | BC-4 | 7.2            | 4.4           | 0.8               | 78.4                                            | 28                  | 26                 | 27                              |
| MFC 3<br>(500 mL) | BC-1 | 7.3            | 4.2           | 0.7               | 74.5                                            | 53                  | 54                 | 54                              |
|                   | BC-2 | 7.9            | 4             | 0.7               | 77.1                                            | 32                  | 37                 | 35                              |
|                   | BC-3 | 7.5            | 3.9           | 0.9               | 75.5                                            | 55                  | 31                 | 43                              |
|                   | BC-4 | 7.5            | 3.9           | 0.8               | 73.6                                            | 25                  | 33                 | 29                              |

BC, Bamboo charcoal

<sup>(a)</sup> Apparent anode area exposed to anolyte

<sup>(b)</sup> [(Lengthwise resistance) + (Widthwise resistance)] / 2

Table S2. Concentrations of inorganic constituents in potato extract (ICP analysis results)

|              |       |       |      |       |      |       |      |      |      |
|--------------|-------|-------|------|-------|------|-------|------|------|------|
| Constituents | B     | Na    | Mg   | Al    | P    | K     | Ca   | V    | Cr   |
| Conc. (ppm)  | 14.8  | 3082  | 5220 | 93.11 | 8534 | 92790 | 1375 | 0.29 | 1.21 |
| Constituents | Mn    | Fe    | Co   | Ni    | Cu   | Ga    | As   | Se   | Rb   |
| Conc. (ppm)  | 18.73 | 30.74 | 0.17 | 1.08  | 1.69 | 0.12  | 0.12 | 0.21 | 30.5 |
| Constituents | Sr    | Cd    | Cs   | Ba    | Ce   | Nd    | W    | Pb   | U    |
| Conc. (ppm)  | 10.49 | 0.12  | 0.04 | 3.53  | 0.01 | 0.01  | 4.37 | 0.01 | 0.02 |

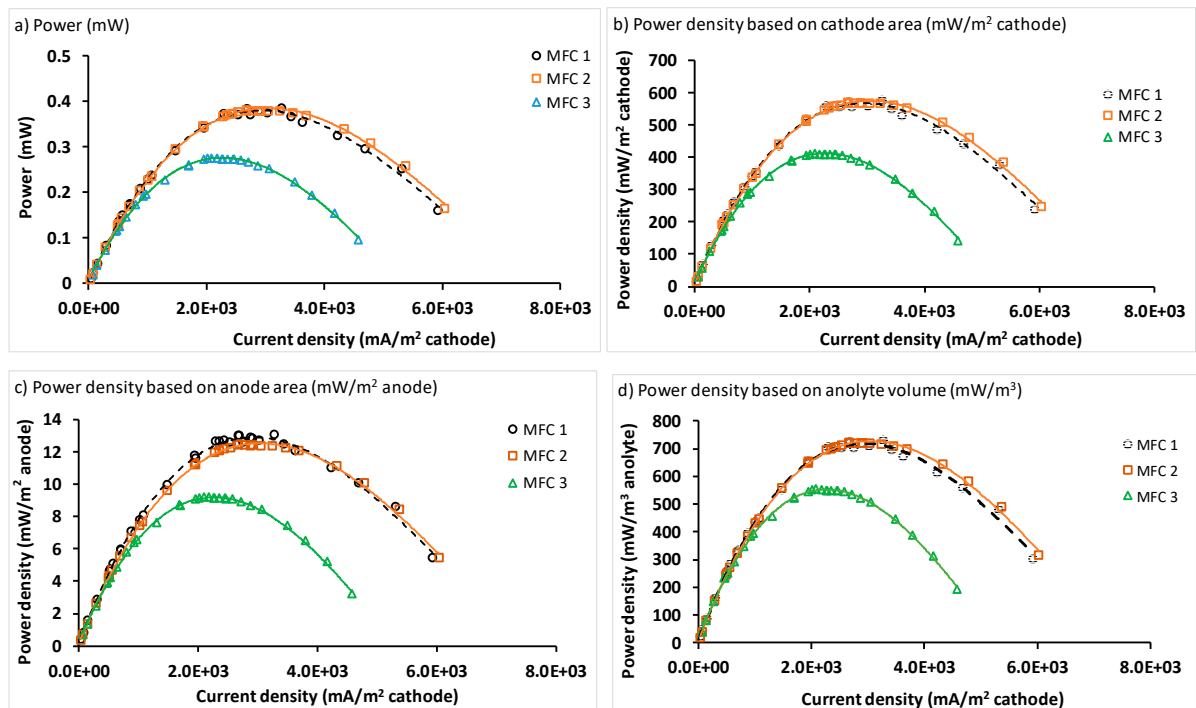

Figure S1. Power and power density curves for MFC 1: (a) power; (b) power density normalized to the cathode area, (c) anode area, and (d) anolyte volume.
